# Supplementary material for: Drug-loaded nanoparticles and supramolecular nanotubes formed from a volatile microemulsion with bile salt derivatives
Source: Royal Society of Chemistry journal article supplement (doi:10.1039/c3cp50258a), 2013-01-01
Supplement: c3cp50258a.pdf [file c3cp50258a.pdf]

# Nanoparticles and supramolecular nanotubes formed from a volatile microemulsion with bile salt derivatives

*K. Margulis-Goshen, M.C. di Gregorio, N.V. Pavel, L. Abezgauz, D. Danino, J. Vázquez Tato, V. H. Soto Tellini, S. Magdassi, L. Galantini*

## Supplementary Information

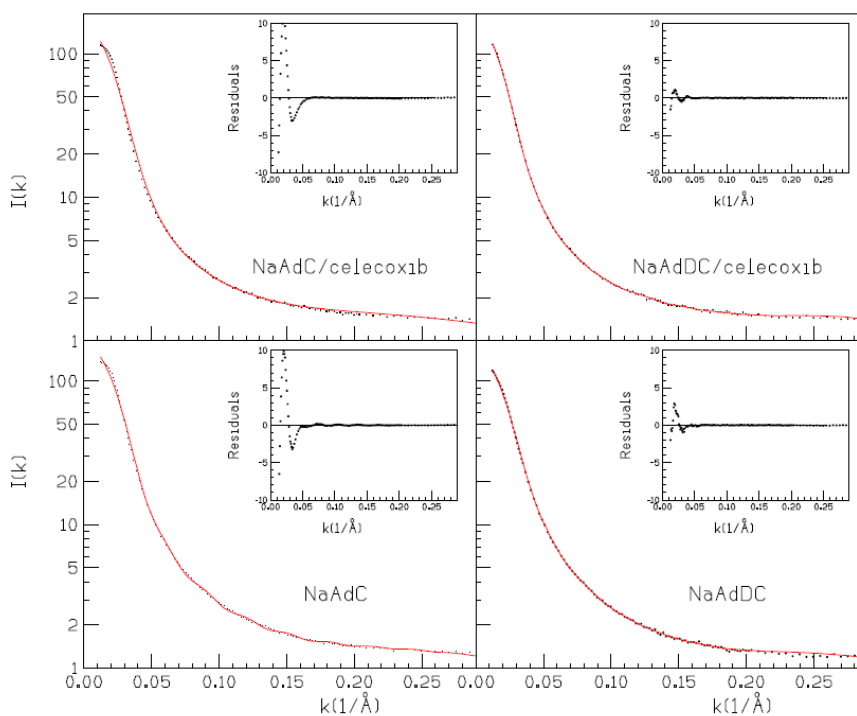

**Fig. S1.** Experimental SAXS spectra (dots) and best fitting curves (in red) for the microemulsions formed by NaAdDC and by NaAdC without and with celecoxib (NaAdDC/celecoxib and NaAdC/celecoxib).

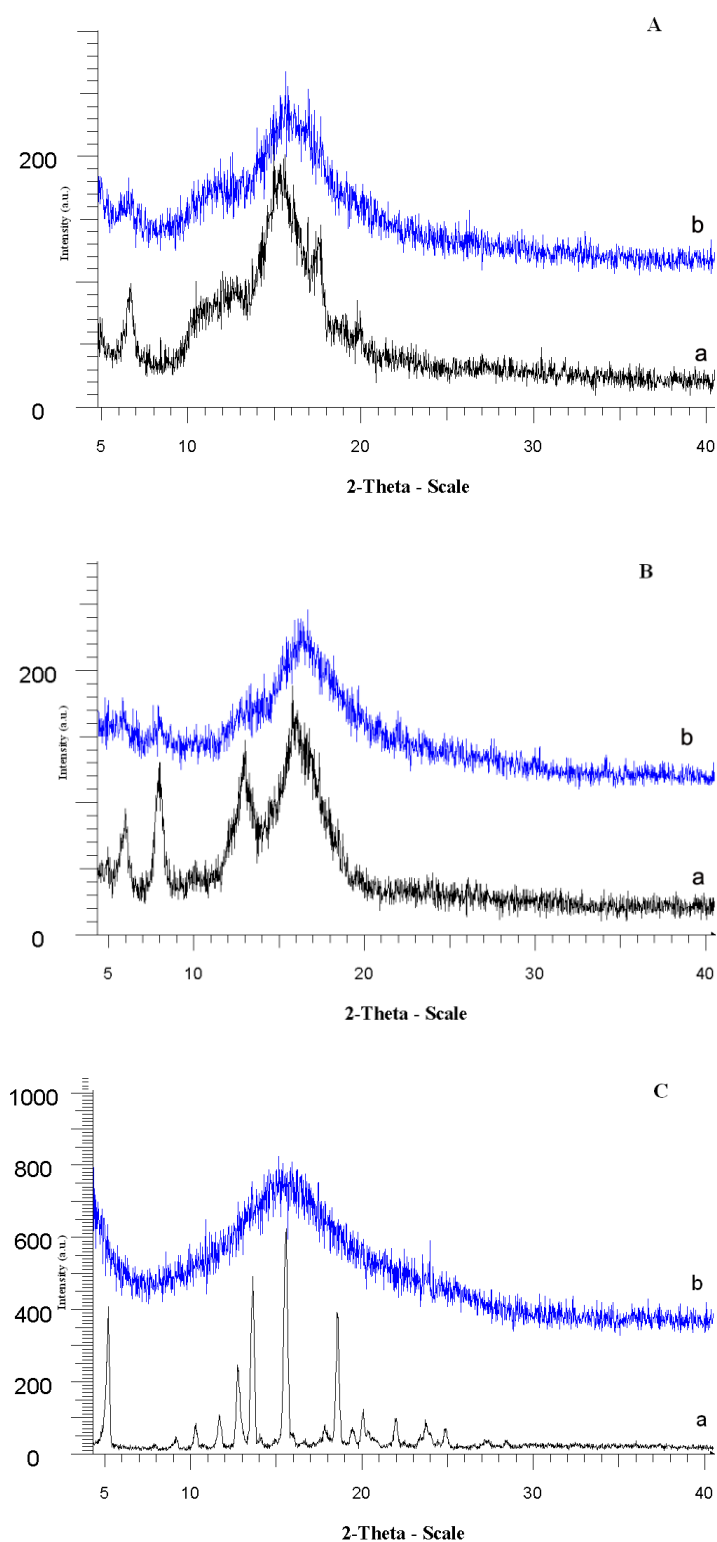

**Fig. S2.** X-ray diffractions of lyophilized powders before the contact with water compared to the diffractions of the pure bile salts. A: NaAdDC-celecoxib powder (b) and pure NaAdDC (a); B: NaAdC-celecoxib powder (b) and pure NaAdC (a); C: sodium deoxycholate-celecoxib powder (b) and pure sodium deoxycholate (a).
